# Supplementary material for: Base-free glucose dehydration catalysed by NHC-stabilised heterohalo cyclopentadienyl Cr(iii) complexes
Source: Royal Society of Chemistry journal article supplement (doi:10.1039/c8nj04804e), 2018-01-01
Supplement: c8nj04804e1.pdf [file c8nj04804e1.pdf]

## Base-free glucose dehydration catalysed by NHC-stabilised heterohalo cyclopentadienyl Cr(III) complexes

F. P. Malan,<sup>a</sup> E. Singleton,<sup>a</sup> P. H. van Rooyen,<sup>a</sup> J. Conradie,<sup>b</sup> and M. Landman<sup>a</sup>

<sup>a</sup> Department of Chemistry, University of Pretoria, 02 Lynnwood Road, Hatfield, Pretoria, 0002, South Africa. <sup>b</sup> Department of Chemistry, University of the Free State, Bloemfontein 9300, South Africa.

### Supporting Information

1. Crystal data and structure refinement for **1-7** (Tables S1,S2)
2. Selected bond lengths and angles for **1-7** (Table S3)
3. Schematic representation of the oxidation and reduction processes (Figure S1)
4. Glucose dehydration using **1-6** (Table S4)
5. <sup>1</sup>H-NMR spectrum of **6**
6. <sup>1</sup>H-NMR spectrum of glucose dehydration reaction mixture

1. Crystal data and structure refinement for **1-7** (Tables S1,S2)

**Table S1**

| Complex                                  | <b>1</b> <sup>a</sup>                                                                   | <b>2</b>                                                                                | <b>3</b>                                              | <b>4</b>                                                                                |
|------------------------------------------|-----------------------------------------------------------------------------------------|-----------------------------------------------------------------------------------------|-------------------------------------------------------|-----------------------------------------------------------------------------------------|
| <b>Emp. formula</b>                      | C <sub>16</sub> H <sub>17</sub> N <sub>2</sub> Cl <sub>1.82</sub> Br <sub>0.18</sub> Cr | C <sub>22</sub> H <sub>21</sub> N <sub>2</sub> Cl <sub>1.36</sub> Br <sub>0.64</sub> Cr | C <sub>16</sub> H <sub>17</sub> N <sub>2</sub> ClBrCr | C <sub>24</sub> H <sub>25</sub> N <sub>2</sub> Cl <sub>1.35</sub> Br <sub>0.65</sub> Cr |
| <b>Form. weight (g.mol<sup>-1</sup>)</b> | 368.11                                                                                  | 464.71                                                                                  | 404.67                                                | 493.15                                                                                  |
| <b>Crystal system</b>                    | monoclinic                                                                              | monoclinic                                                                              | orthorhombic                                          | orthorhombic                                                                            |
| <b>Space group</b>                       | <i>P2<sub>1</sub>/c</i>                                                                 | <i>P2<sub>1</sub>/c</i>                                                                 | <i>Pbca</i>                                           | <i>P2<sub>1</sub>2<sub>1</sub>2<sub>1</sub></i>                                         |
| <b>Crystal descr.</b>                    | blue blade                                                                              | blue blade                                                                              | blue needle                                           | blue block                                                                              |
| <b>a (Å)</b>                             | 22.494(6)                                                                               | 11.578(3)                                                                               | 7.8759(5)                                             | 9.9270(1)                                                                               |
| <b>b (Å)</b>                             | 6.2985(2)                                                                               | 20.917(5)                                                                               | 16.9413(11)                                           | 14.6703(1)                                                                              |
| <b>c (Å)</b>                             | 22.856(6)                                                                               | 16.763(4)                                                                               | 25.1308(16)                                           | 15.1733(2)                                                                              |
| <b>α (°)</b>                             | 90                                                                                      | 90                                                                                      | 90                                                    | 90                                                                                      |
| <b>β (°)</b>                             | 95.878(6)                                                                               | 91.965(5)                                                                               | 90                                                    | 90                                                                                      |
| <b>γ (°)</b>                             | 90                                                                                      | 90                                                                                      | 90                                                    | 90                                                                                      |
| <b>Volume (Å<sup>3</sup>)</b>            | 3221.1(2)                                                                               | 4057.2(2)                                                                               | 3353.2(4)                                             | 2209.7(4)                                                                               |
| <b>Z</b>                                 | 8                                                                                       | 8                                                                                       | 8                                                     | 4                                                                                       |
| <b>Abs. coeff. (m.mm<sup>-1</sup>)</b>   | 1.447                                                                                   | 2.010                                                                                   | 3.219                                                 | 1.865                                                                                   |
| <b>F(000)</b>                            | 1506.0                                                                                  | 1892.0                                                                                  | 1624.0                                                | 1011.0                                                                                  |
| <b>Independent refl.</b>                 | 4518                                                                                    | 7419                                                                                    | 5221                                                  | 4546                                                                                    |
| <b>Completeness (%)</b>                  | 98.4                                                                                    | 100.0                                                                                   | 99.4                                                  | 100.0                                                                                   |
| <b>Data/Restr/Para</b>                   | 4518/0/205                                                                              | 7419/0/491                                                                              | 5221/0/200                                            | 4546/0/264                                                                              |

|                                                  |            |            |            |            |
|--------------------------------------------------|------------|------------|------------|------------|
| Goodness of fit on F <sup>2</sup>                | 1.121      | 0.990      | 0.982      | 1.055      |
| Final R <sub>1</sub> indexes                     | 0.1568     | 0.0722     | 0.0695     | 0.0211     |
| wR <sub>2</sub> indices (all data)               | 0.3369     | 0.1436     | 0.1954     | 0.0481     |
| Largest diff. peak and hole (e.Å <sup>-3</sup> ) | 1.07/-0.90 | 0.57/-0.42 | 1.41/-1.23 | 0.25/-0.28 |

<sup>a</sup> Data not suitable for CCD deposition; used for comparison purposes only

**Table S2**

| Complex                                          | 5                                                                                       | 6                                                                                                  | 7                                                                 |
|--------------------------------------------------|-----------------------------------------------------------------------------------------|----------------------------------------------------------------------------------------------------|-------------------------------------------------------------------|
| Emp. formula                                     | C <sub>23</sub> H <sub>23</sub> N <sub>2</sub> Cl <sub>1.24</sub> Br <sub>0.76</sub> Cr | C <sub>18</sub> H <sub>22</sub> N <sub>4</sub> Cl <sub>5.0</sub> Br <sub>0.8</sub> Cr <sub>2</sub> | C <sub>23</sub> H <sub>23</sub> N <sub>2</sub> Cl <sub>2</sub> Cr |
| Form. weight (g.mol <sup>-1</sup> )              | 484.23                                                                                  | 493.15                                                                                             | 450.33                                                            |
| Crystal system                                   | orthorhombic                                                                            | monoclinic                                                                                         | monoclinic                                                        |
| Space group                                      | P2 <sub>1</sub> 2 <sub>1</sub> 2 <sub>1</sub>                                           | P2 <sub>1</sub>                                                                                    | P2 <sub>1</sub> /c                                                |
| Crystal descr.                                   | blue block                                                                              | blue block                                                                                         | blue block                                                        |
| a (Å)                                            | 9.920(4)                                                                                | 7.7436(1)                                                                                          | 9.3840(6)                                                         |
| b (Å)                                            | 14.406(6)                                                                               | 7.0456(9)                                                                                          | 14.9768(1)                                                        |
| c (Å)                                            | 14.898(6)                                                                               | 11.7412(2)                                                                                         | 14.9659(1)                                                        |
| α (°)                                            | 90                                                                                      | 90                                                                                                 | 90                                                                |
| β (°)                                            | 90                                                                                      | 92.740(4)                                                                                          | 92.549(2)                                                         |
| γ (°)                                            | 90                                                                                      | 90                                                                                                 | 90                                                                |
| Volume (Å <sup>3</sup> )                         | 2129.0(2)                                                                               | 639.85(2)                                                                                          | 2101.3(2)                                                         |
| Z                                                | 4                                                                                       | 1                                                                                                  | 4                                                                 |
| Abs. coeff. (m.mm <sup>-1</sup> )                | 2.135                                                                                   | 2.596                                                                                              | 0.810                                                             |
| F(000)                                           | 987.0                                                                                   | 322.0                                                                                              | 932.0                                                             |
| Independent refl.                                | 4388                                                                                    | 2831                                                                                               | 4752                                                              |
| Completeness (%)                                 | 99.8                                                                                    | 99.9                                                                                               | 99.6                                                              |
| Data/Restr/Para                                  | 4388/0/255                                                                              | 2831/1/141                                                                                         | 4752/0/253                                                        |
| Goodness of fit on F <sup>2</sup>                | 1.066                                                                                   | 1.097                                                                                              | 0.904                                                             |
| Final R <sub>1</sub> indexes                     | 0.0439                                                                                  | 0.0738                                                                                             | 0.0446                                                            |
| wR <sub>2</sub> indices (all data)               | 0.1035                                                                                  | 0.2152                                                                                             | 0.1419                                                            |
| Largest diff. peak and hole (e.Å <sup>-3</sup> ) | 0.82/-0.40                                                                              | 1.29/-1.08                                                                                         | 0.66/-0.68                                                        |

2. Selected bond lengths and angles for **1-7 (Table S3)**

| Description                                                     | 1          | 2           | 3          | 4           | 5         | 6        | 7                      |
|-----------------------------------------------------------------|------------|-------------|------------|-------------|-----------|----------|------------------------|
| Cr1-C1                                                          | 2.107(2)   | 2.102(7)    | 2.108(3)   | 2.132(2)    | 2.127(5)  | -        | 2.117(3)               |
| Cr1-Cg <sup>a</sup>                                             | 1.886(5)   | 1.897(9)    | 1.891(9)   | 1.904(5)    | 1.902(7)  | 1.895(6) | 1.888(9)               |
| Cr1-X1 <sup>b</sup>                                             | 2.321(6)   | 2.3548(2)   | 2.3254(9)  | 2.3584(7)   | 2.3730(2) | 2.324(4) | 2.3225(9)              |
| Cr1-X2 <sup>b</sup>                                             | 2.328(5)   | 2.3988(2)   | 2.3471(9)  | 2.3933(6)   | 2.4066(2) | 2.360(3) | 2.3242(9) <sup>d</sup> |
| Cr1-C1-Cl1                                                      | 97.239(2)  | 96.450(2)   | 97.804(3)  | 100.486(2)  | 82.817(3) | -        | 97.478(3)              |
| Cr1-C1-Br1                                                      | 100.114(2) | 99.832(2)   | 97.724(3)  | 98.161(2)   | 99.652(3) | -        | 98.551(3) <sup>e</sup> |
| C <sub>β</sub> -C <sub>α</sub> -N1-C1 <sup>c</sup>              | 127.841(2) | -77.168(5)  | -          | 128.727(2)  | -         | -        | -72.823(4)             |
| C <sub>β</sub> -C <sub>α</sub> -N2-C1 <sup>c</sup>              | -          | -132.343(5) | 112.056(5) | -134.143(2) | 81.480(6) | -        | 112.804(3)             |
| C <sub>V</sub> -C <sub>β</sub> -C <sub>α</sub> -N1 <sup>c</sup> | 119.699(2) | -54.622(6)  | -          | -74.162(2)  | 71.272(5) | -        | 152.008(3)             |
| C <sub>V</sub> -C <sub>β</sub> -C <sub>α</sub> -N2 <sup>c</sup> | -          | -124.305(6) | 175.804(5) | 71.238(2)   | -         | -        | -179.548(3)            |

<sup>a</sup> Cg = centroid of cyclopentadienyl moiety. <sup>b</sup> X1, X2 = Cl, Br. <sup>c</sup> C<sub>α</sub>, C<sub>β</sub>, and C<sub>V</sub> denotes the primary, secondary, and tertiary carbon atoms attached to the NX (X = 1, 2) atom, in the former respective order. <sup>d</sup> The Cr1-Cl2 bond distance refers. <sup>e</sup> The Cr1-C1-Cl2 bond angle refers.

3. Schematic representation of the oxidation and reduction processes (**Figure S1**)

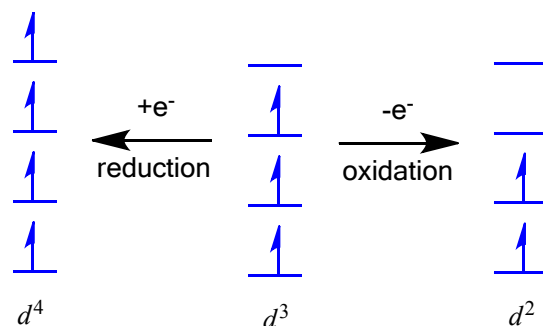

**Figure S1:** Schematic representation of the oxidation and reduction process of the Cr(III)-NHC complexes [CpCrBrCl(NHC)] (**1–5**). The blue arrows represent electrons (up arrow is an alpha up-spin electron).

4. Glucose dehydration using **1-6** (**Table S4**)

| Entry | Catalyst (5 mol%)                    | Conversion (%) | HMF Yield (%) | Other (%) | TOF (h <sup>-1</sup> ) |
|-------|--------------------------------------|----------------|---------------|-----------|------------------------|
| 1     | -                                    | 14.9           | 3.8           | 11.1      | 0.0                    |
| 2     | CrCl <sub>3</sub> (THF) <sub>3</sub> | 89.8           | 89.8          | 0.0       | 9.9                    |
| 3     | <b>2</b> (room temperature)          | 34.0           | 34.0          | 0.0       | 0.2                    |
| 4     | <b>2</b> (3 mol%)                    | 48.1           | 34.8          | 13.3      | 1.22                   |
| 5     | <b>2</b> (10 mol%)                   | 92.3           | 73.1          | 19.2      | 3.00                   |
| 6     | <b>2</b>                             | 68.6           | 68.6          | 0.00      | 2.62                   |
| 7     | <b>2</b> (THF)                       | 64.7           | 51.3          | 13.4      | 3.82                   |
| 8     | <b>1</b>                             | 71.7           | 37.2          | 34.5      | 3.69                   |
| 9     | <b>3</b>                             | 76.0           | 35.5          | 40.5      | 3.13                   |
| 10    | <b>4</b>                             | 60.3           | 56.3          | 4.0       | 2.02                   |
| 11    | <b>5</b>                             | 51.7           | 48.3          | 3.4       | 2.08                   |
| 12    | <b>6</b>                             | 80.6           | 76.0          | 4.6       | 5.44                   |

General conditions: (+)-D-glucose (0.11 mmol), [Cr] (6 mol%), DMSO (4 mL), anisole (0.11 mmol), 120 °C.

5.  $^1\text{H}$ -NMR spectrum of **6**

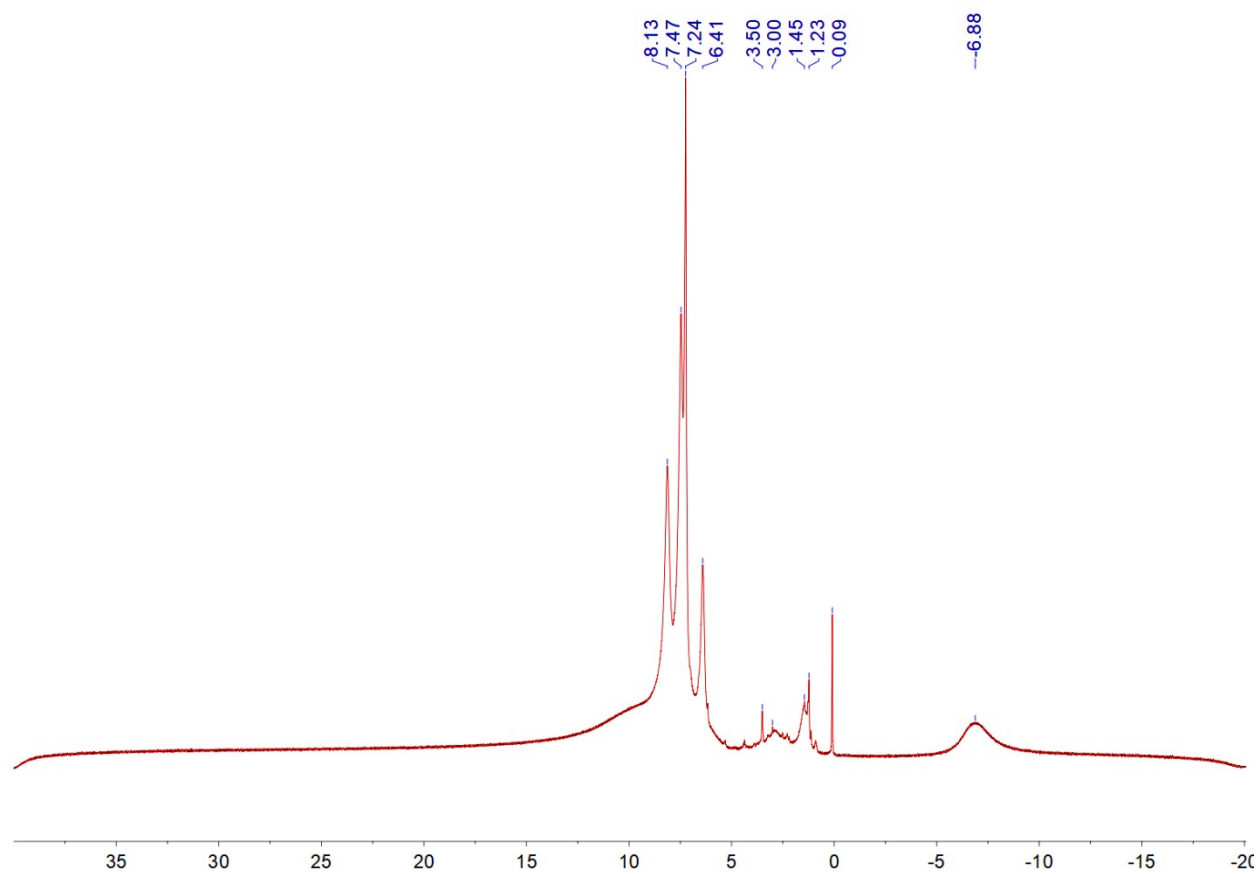

6.  $^1\text{H-NMR}$  spectrum of glucose dehydration reaction mixture

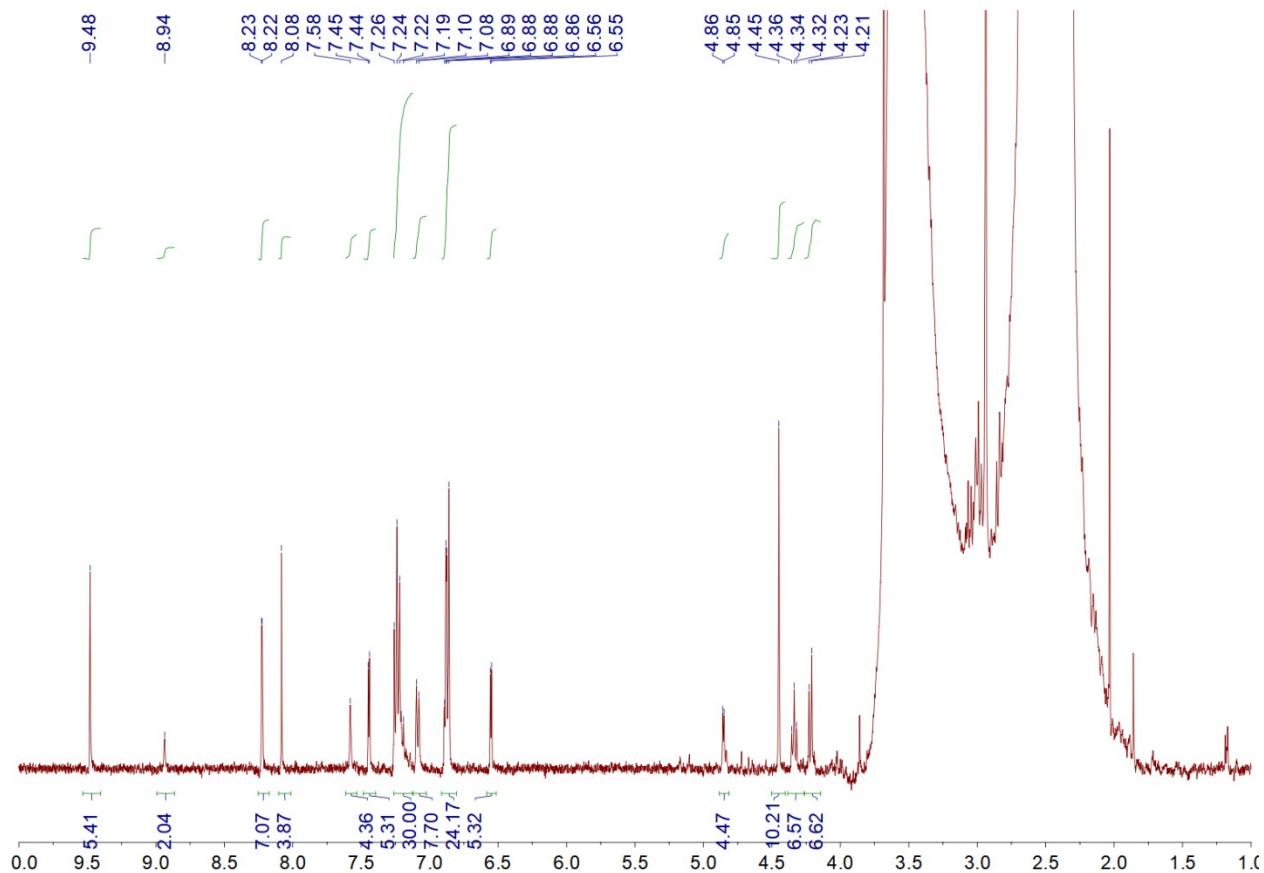

General conditions: (+)-D-glucose (0.11 mmol), **[1]** (6 mol%), anisole (0.11 mmol), 120 °C.  
Aliquot taken after 1 hour reaction time, analysed using  $\text{d}_6\text{-DMSO}$ .
